# Supplementary material
Source: PubMed Central journal article supplement (PMC4789855)

## Supplementary figures

**Fig A** Funnel plot for baseline fasting glucose 100-125 mg/dL

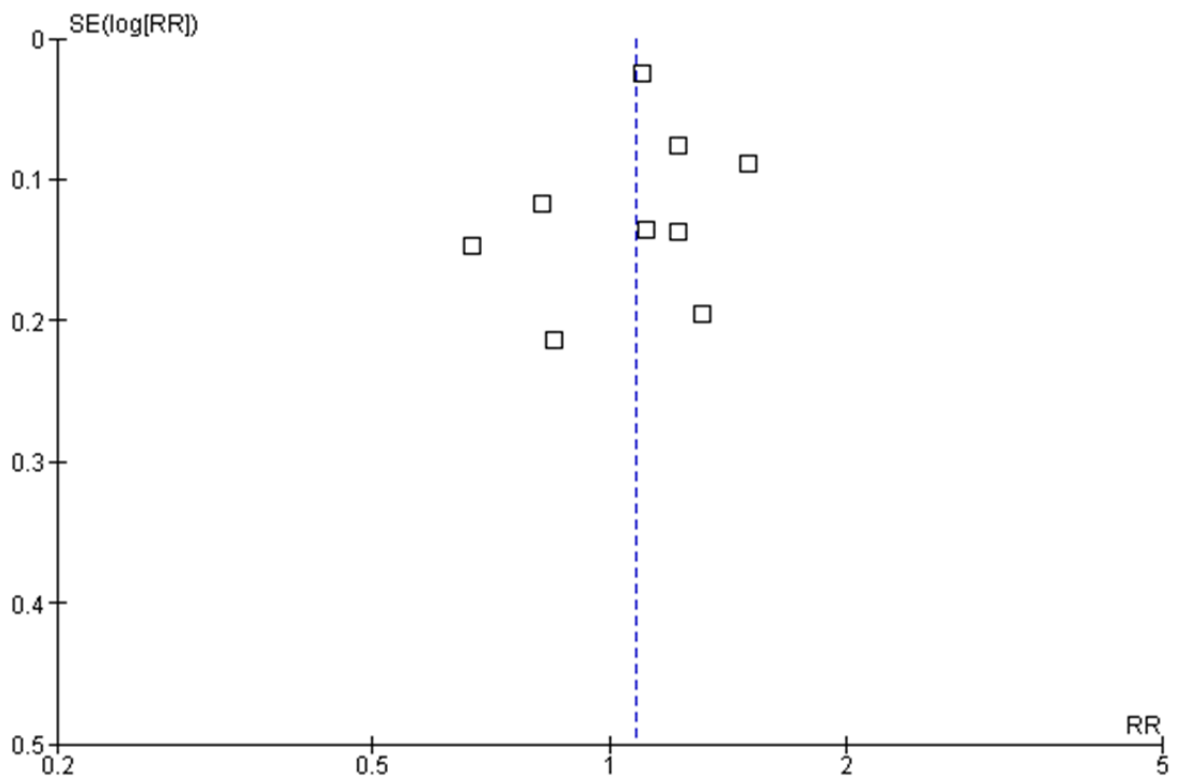

**Fig B** Funnel plot for baseline fasting glucose 110-125 mg/dL

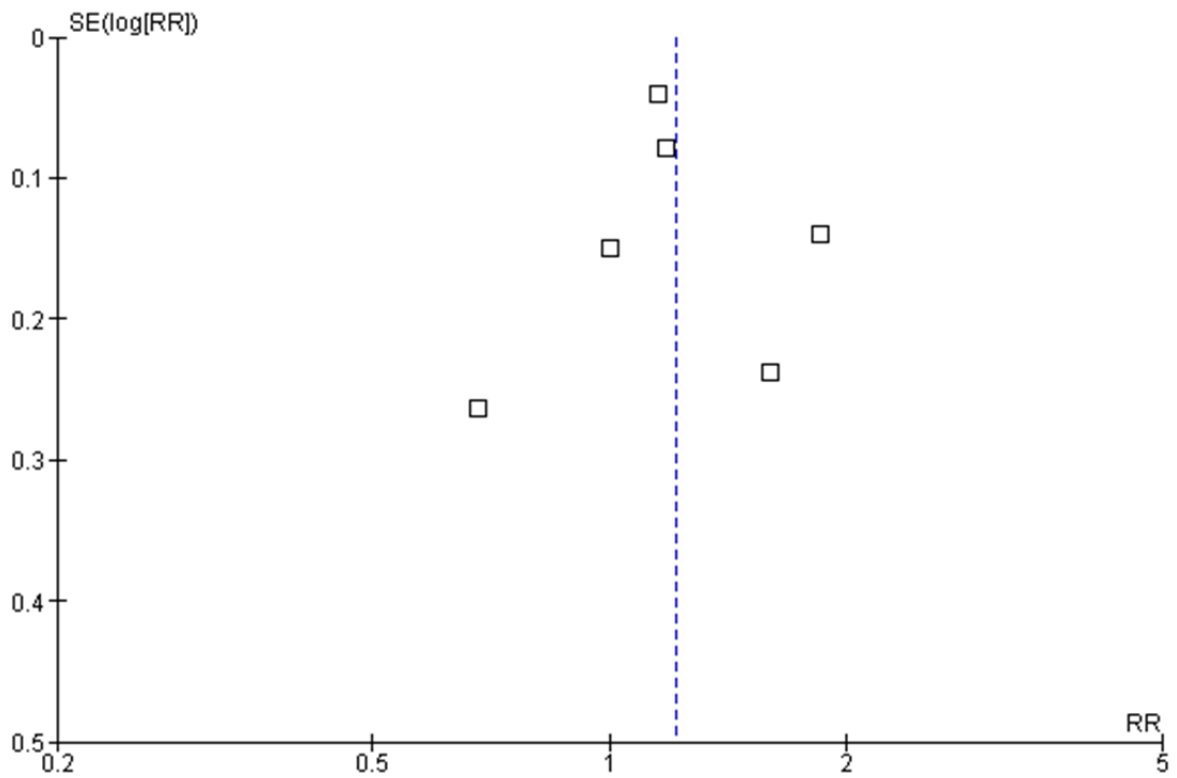

**Fig C** Funnel plot for baseline impaired glucose tolerance (IGT) or combination of IGT and impaired fasting glucose

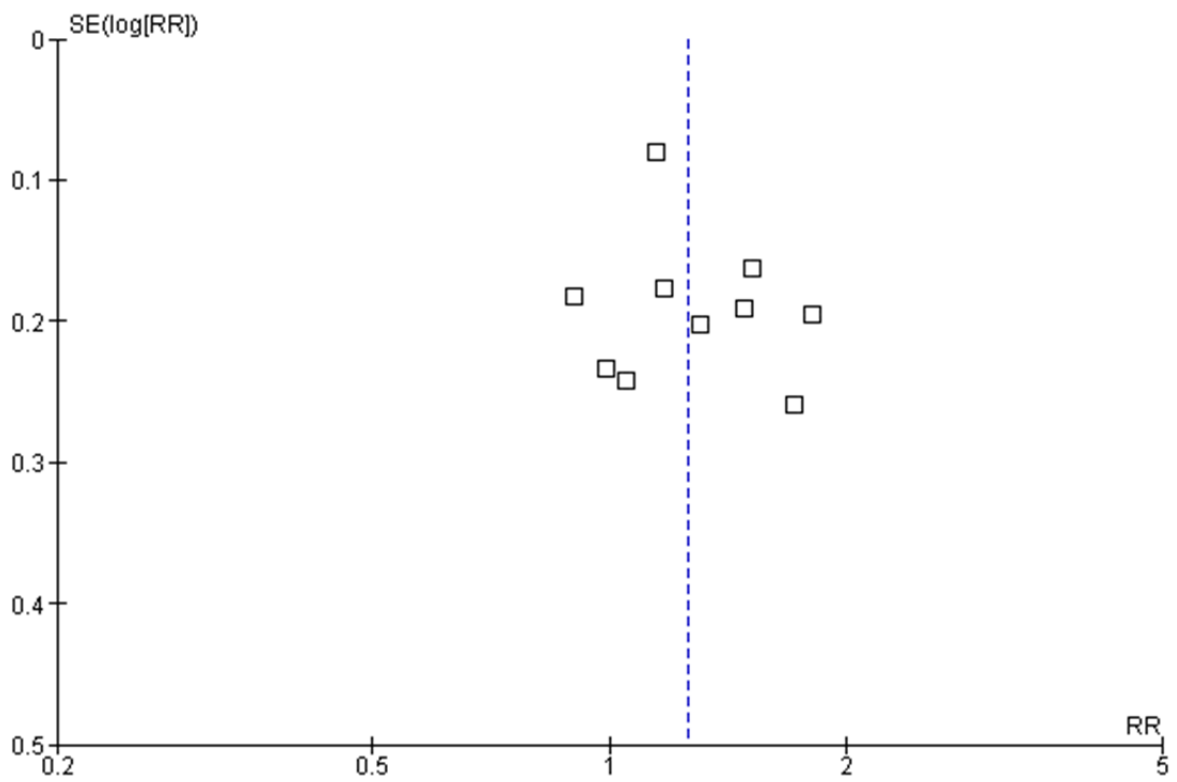

Supplement: leem003376.ww1_default.pdf [file leem003376.ww1_default.pdf]
